# Supplementary material
Source: Royal Society of Chemistry journal article supplement (doi:10.1039/d6fb00093b)
Supplement: d6fb00093b1.pdf [file d6fb00093b1.pdf]

## Supplementary Information

### **Impact of canola seed dehulling and pressing temperature on the microstructure of canola meals, protein structure within the meals, and protein isolate extraction and properties**

Abouzar Karimi<sup>a</sup>, Tos Phuangmarayat<sup>a</sup>, Pankaj Bhowmik<sup>b</sup>, Anusha Samaranayaka<sup>b</sup>, Lingyun Chen<sup>a\*</sup>

<sup>a</sup> *Department of Agricultural, Food and Nutritional Science, University of Alberta, Edmonton, T6G 2P5, AB, Canada*

<sup>b</sup> *Aquatic and Crop Resource Development, National Research Council of Canada, 110 Gymnasium Place, Saskatoon, S7N0W9, SK, Canada*

\* Corresponding author, email address: [lingyun.chen@ualberta.ca](mailto:lingyun.chen@ualberta.ca)

| Treatments      | Seed + hull weight before dehulling (g) | Hull weight (18% hull content) (g) | Seed + hull weight after dehulling (g) | Removed hulls (g) | Dehulling efficiency (%) |
|-----------------|-----------------------------------------|------------------------------------|----------------------------------------|-------------------|--------------------------|
| Dehulled meal 1 | 502.12                                  | 90.3816                            | 429.3                                  | 72.82             | 80.56949645              |
| Dehulled meal 2 | 500.59                                  | 90.1062                            | 426.12                                 | 74.47             | 82.64692108              |
| Dehulled meal 3 | 504.33                                  | 90.7794                            | 428.55                                 | 75.78             | 83.47708841              |

Table S1. Canola meal dehulling efficiency

Table S2. Protein content of canola meals

|        | Nitrogen content (%) | Protein content (%) (Conversion Factor: 5.7) |
|--------|----------------------|----------------------------------------------|
| ND401  | 6.447                | 36.7479                                      |
| ND402  | 6.408                | 36.5256                                      |
| ND403  | 6.474                | 36.9018                                      |
| ND801  | 6.957                | 39.6549                                      |
| ND802  | 6.753                | 38.4921                                      |
| ND803  | 6.602                | 37.6314                                      |
| ND1201 | 6.964                | 39.6948                                      |
| ND1202 | 6.955                | 39.6435                                      |
| ND1203 | 6.967                | 39.7119                                      |
| D401   | 7.688                | 43.8216                                      |
| D402   | 7.774                | 44.3118                                      |
| D403   | 7.871                | 44.8647                                      |
| D801   | 7.951                | 45.3207                                      |
| D802   | 7.8                  | 44.46                                        |
| D803   | 7.781                | 44.3517                                      |
| D1201  | 7.974                | 45.4518                                      |
| D1202  | 7.904                | 45.0528                                      |
| D1203  | 7.723                | 44.0211                                      |

Abbreviations: ND40, ND80, and ND120, non-dehulled meals treated at 40, 80, and 120 °C, respectively; D40, D80, and D120, dehulled meals treated at 40, 80, and 120 °C, respectively.

Notes  
 Input Data  
 Descriptive Statistics

|       | N Analysis | N Missing | Mean    | Standard Deviation | SE of Mean |
|-------|------------|-----------|---------|--------------------|------------|
| ND40  | 3          | 0         | 36.7251 | 0.18913            | 0.1092     |
| ND80  | 3          | 0         | 38.5928 | 1.0155             | 0.5863     |
| ND120 | 3          | 0         | 39.6834 | 0.0356             | 0.02055    |
| D40   | 3          | 0         | 44.3327 | 0.52186            | 0.3013     |
| D80   | 3          | 0         | 44.7108 | 0.53096            | 0.30655    |
| D120  | 3          | 0         | 44.8419 | 0.7383             | 0.42626    |

ANOVA

Overall ANOVA

|       | DF | Sum of Squares | Mean Square | F Value   | Prob>F  |
|-------|----|----------------|-------------|-----------|---------|
| Model | 5  | 192.1533       | 38.43066    | 106.37634 | <0.0001 |
| Error | 12 | 4.33525        | 0.36127     |           |         |
| Total | 17 | 196.48855      |             |           |         |

Null Hypothesis: The means of all levels are equal.  
 Alternative Hypothesis: The means of one or more levels are different.  
**At the 0.05 level, the population means are significantly different.**

Fit Statistics

| R-Square | Coeff Var | Root MSE | Data Mean |
|----------|-----------|----------|-----------|
| 0.97794  | 0.01449   | 0.60106  | 41.48112  |

Means Comparisons

Tukey Test

Grouping Letters Table

Tukey Test

|       | Mean    | Groups |
|-------|---------|--------|
| D120  | 44.8419 | A      |
| D80   | 44.7108 | A      |
| D40   | 44.3327 | A      |
| ND120 | 39.6834 | B      |
| ND80  | 38.5928 | B      |
| ND40  | 36.7251 | C      |

Means that do not share a letter are significantly different.

Sig equals 1 indicates that the difference of the means is significant at the 0.05 level.  
 Sig equals 0 indicates that the difference of the means is not significant at the 0.05 level.

Figure S1. ANOVA and Tukey's test results of non-dehulled (ND) and dehulled (D) canola meals treated at 40 °C (ND40 and D40), 80 °C (ND80 and D80) and 120 °C (ND120 and D120). Different letters in the Tukey's test (a-c) indicate significant differences ( $p < 0.05$ ) between the protein contents of the meals.

Table S3. Protein content and extraction efficiency of isolates.

|         | Extract Weight (g) | Nitrogen content (%) | Protein content (%) (Conversion Factor: 5.7) | Extraction efficiency (%) |
|---------|--------------------|----------------------|----------------------------------------------|---------------------------|
| ND40A1  | 3.2                | 13.9                 | 79.23                                        | 69.03616328               |
| ND40A2  | 3.05               | 13.76                | 78.432                                       | 65.13735837               |
| ND40A3  | 3.1                | 13.47                | 76.779                                       | 64.80987118               |
| ND80A1  | 3.04               | 14.28                | 81.396                                       | 64.11658133               |
| ND80A2  | 3                  | 14.29                | 81.453                                       | 63.31725089               |
| ND80A3  | 3.02               | 14.31                | 81.567                                       | 63.82857424               |
| ND120A1 | 2.27               | 14.96                | 85.272                                       | 48.77793737               |
| ND120A2 | 2.13               | 15.02                | 85.614                                       | 45.95317438               |
| ND120A3 | 2.37               | 14.85                | 84.645                                       | 50.55228383               |
| D40A1   | 3.95               | 14.83                | 84.531                                       | 75.31629023               |
| D40A2   | 3.89               | 14.66                | 83.562                                       | 73.32199031               |
| D40A3   | 3.92               | 14.74                | 84.018                                       | 74.2906613                |
| D80A1   | 3.78               | 14.78                | 84.246                                       | 71.22437532               |
| D80A2   | 3.8                | 14.8                 | 84.36                                        | 71.69811321               |
| D80A3   | 3.79               | 14.79                | 84.303                                       | 71.46111678               |
| D120A1  | 3.43               | 15.14                | 86.298                                       | 66.01016906               |
| D120A2  | 3.27               | 15.08                | 85.956                                       | 62.68158129               |
| D120A3  | 3.38               | 14.85                | 84.645                                       | 63.80195754               |
| ND40S1  | 2.12               | 15.4                 | 87.78                                        | 50.67204718               |
| ND40S2  | 2.13               | 15.32                | 87.324                                       | 50.6465932                |
| ND40S3  | 2                  | 15.39                | 87.723                                       | 47.77277666               |
| ND80S1  | 2.03               | 15.92                | 90.744                                       | 47.73178417               |

|         |      |       |        |             |
|---------|------|-------|--------|-------------|
| ND80S2  | 2.16 | 15.6  | 88.92  | 49.76762505 |
| ND80S3  | 2.03 | 15.76 | 89.832 | 47.25206774 |
| ND120S1 | 1.82 | 15.75 | 89.775 | 41.17351336 |
| ND120S2 | 1.94 | 15.58 | 88.806 | 43.41453605 |
| ND120S3 | 1.84 | 15.7  | 89.49  | 41.49382361 |
| D40S1   | 2.8  | 15.68 | 89.376 | 56.44880641 |
| D40S2   | 2.83 | 15.62 | 89.034 | 56.83529765 |
| D40S3   | 2.75 | 15.81 | 90.117 | 55.90044143 |
| D80S1   | 2.89 | 15.69 | 89.433 | 57.80736869 |
| D80S2   | 2.65 | 15.97 | 91.029 | 53.9527027  |
| D80S3   | 2.71 | 16.02 | 91.314 | 55.34701683 |
| D120S1  | 2.66 | 15.64 | 89.148 | 52.88216601 |
| D120S2  | 2.6  | 15.76 | 89.832 | 52.08592856 |
| D120S3  | 2.6  | 15.67 | 89.319 | 51.78848354 |

Abbreviations: ND40A, ND80A, ND120A, D40A, D80A, and D120A, protein isolates extracted from non-dehulled and dehulled meals via alkaline extraction; ND40S, ND80S, ND120S, D40S, D80S, and D120S, protein isolates extracted from non-dehulled and dehulled meals via salt extraction.

Notes

Input Data

Descriptive Statistics

|        | N Analysis | N Missing | Mean     | Standard Deviation | SE of Mean |
|--------|------------|-----------|----------|--------------------|------------|
| ND40A  | 3          | 0         | 66.3278  | 2.35122            | 1.35748    |
| ND80A  | 3          | 0         | 63.75414 | 0.40483            | 0.23373    |
| ND120A | 3          | 0         | 48.4278  | 2.31946            | 1.33914    |
| D40A   | 3          | 0         | 74.30965 | 0.99729            | 0.57578    |
| D80A   | 3          | 0         | 71.4612  | 0.23687            | 0.13676    |
| D120A  | 3          | 0         | 64.16457 | 1.69366            | 0.97784    |

ANOVA

Overall ANOVA

|       | DF | Sum of Squares | Mean Square | F Value  | Prob>F  |
|-------|----|----------------|-------------|----------|---------|
| Model | 5  | 1219.9943      | 243.99886   | 97.65678 | <0.0001 |
| Error | 12 | 29.98242       | 2.49853     |          |         |
| Total | 17 | 1249.97671     |             |          |         |

Null Hypothesis: The means of all levels are equal.  
 Alternative Hypothesis: The means of one or more levels are different.  
**At the 0.05 level, the population means are significantly different.**

Fit Statistics

| R-Square | Coeff Var | Root MSE | Data Mean |
|----------|-----------|----------|-----------|
| 0.97601  | 0.02442   | 1.58068  | 64.74086  |

Means Comparisons

Tukey Test

Grouping Letters Table

Tukey Test

|        | Mean     | Groups |
|--------|----------|--------|
| D40A   | 74.30965 | A      |
| D80A   | 71.4612  | A      |
| ND40A  | 66.3278  | B      |
| D120A  | 64.16457 | B      |
| ND80A  | 63.75414 | B      |
| ND120A | 48.4278  | C      |

Means that do not share a letter are significantly different.

Sig equals 1 indicates that the difference of the means is significant at the 0.05 level.  
 Sig equals 0 indicates that the difference of the means is not significant at the 0.05 level.

Notes

Input Data

Descriptive Statistics

|        | N Analysis | N Missing | Mean     | Standard Deviation | SE of Mean |
|--------|------------|-----------|----------|--------------------|------------|
| ND40S  | 3          | 0         | 49.69714 | 1.6666             | 0.96221    |
| ND80S  | 3          | 0         | 48.25049 | 1.33559            | 0.7711     |
| ND120S | 3          | 0         | 42.02729 | 1.21202            | 0.69976    |
| D40S   | 3          | 0         | 56.39485 | 0.46976            | 0.27121    |
| D80S   | 3          | 0         | 55.70236 | 1.95175            | 1.12684    |
| D120S  | 3          | 0         | 52.25219 | 0.56548            | 0.32648    |

ANOVA

Overall ANOVA

|       | DF | Sum of Squares | Mean Square | F Value  | Prob>F  |
|-------|----|----------------|-------------|----------|---------|
| Model | 5  | 426.25007      | 85.25001    | 49.27707 | <0.0001 |
| Error | 12 | 20.76017       | 1.73001     |          |         |
| Total | 17 | 447.01024      |             |          |         |

Null Hypothesis: The means of all levels are equal.  
 Alternative Hypothesis: The means of one or more levels are different.  
**At the 0.05 level, the population means are significantly different.**

Fit Statistics

| R-Square | Coeff Var | Root MSE | Data Mean |
|----------|-----------|----------|-----------|
| 0.95356  | 0.02593   | 1.3153   | 50.72072  |

Means Comparisons

Tukey Test

Grouping Letters Table

Tukey Test

|        | Mean     | Groups |
|--------|----------|--------|
| D40S   | 56.39485 | A      |
| D80S   | 55.70236 | A B    |
| D120S  | 52.25219 | B C    |
| ND40S  | 49.69714 | C D    |
| ND80S  | 48.25049 | D      |
| ND120S | 42.02729 | E      |

Means that do not share a letter are significantly different.

Sig equals 1 indicates that the difference of the means is significant at the 0.05 level.  
 Sig equals 0 indicates that the difference of the means is not significant at the 0.05 level.

Figure S2. ANOVA and Tukey's test results of the extraction efficiency of the isolates extracted from non-dehulled and dehulled meals through alkaline (ND40A, ND80A, ND120A, D40A, D80A and D120A) and salt (ND40S, ND80S, ND120S, D40S, D80S, D120S) extraction. Different letters (a-e) in the Tukey's test indicate significant differences ( $p < 0.05$ ) between the extraction efficiency of the isolates.

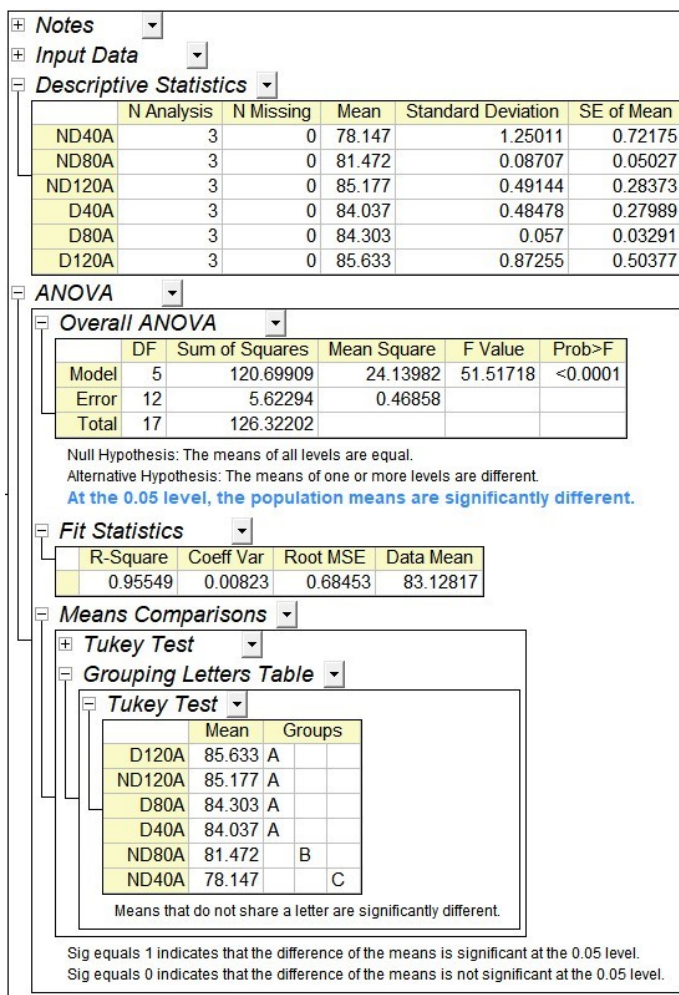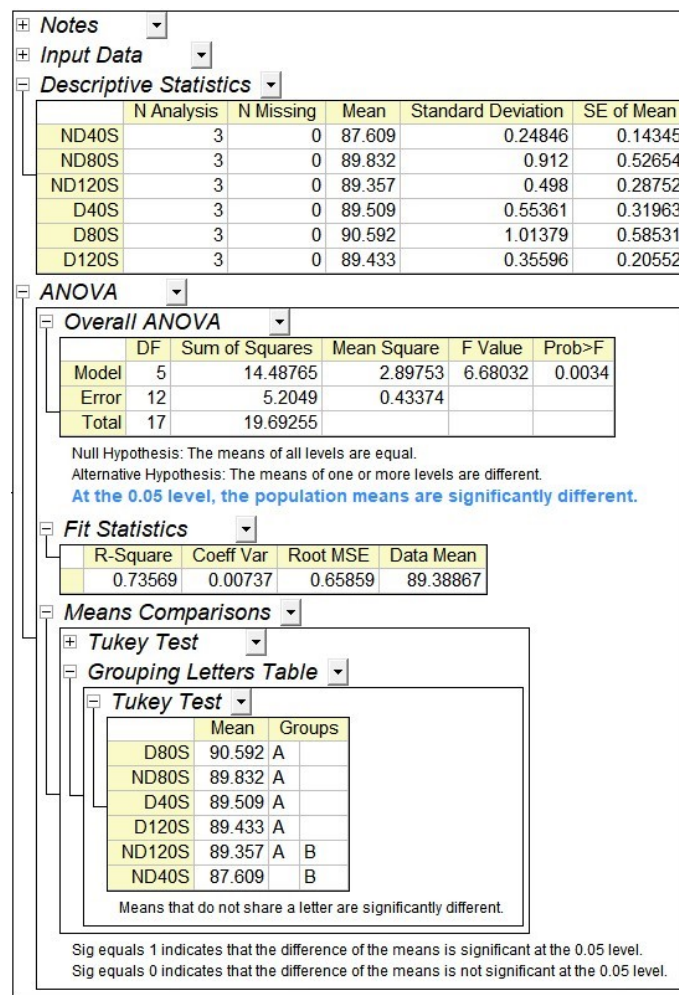

Figure S3. ANOVA and Tukey's test results of the protein content of the isolates extracted from non-dehulled and dehulled meals through alkaline (ND40A, ND80A, ND120A, D40A, D80A and D120A) and salt (ND40S, ND80S, ND120S, D40S, D80S, D120S) extraction. Different letters (a-c) in the Tukey's test indicate significant differences ( $p < 0.05$ ) between the protein content of the isolates.

Table S3: CIELAB color space parameters of canola meals and protein isolates

|        | L*    | a*    | b*    |
|--------|-------|-------|-------|
| ND401  | 74.1  | -2.82 | 23.26 |
| ND402  | 74    | -2.8  | 23.27 |
| ND403  | 73.56 | -2.73 | 23.21 |
| ND801  | 74.38 | -2.91 | 23.96 |
| ND802  | 74.96 | -2.98 | 24.24 |
| ND803  | 75.4  | -3.01 | 24.32 |
| ND1201 | 60.07 | -0.44 | 22.22 |
| ND1202 | 60.02 | -0.44 | 22.26 |
| ND1203 | 59.9  | -0.46 | 22.13 |
| D401   | 80.91 | -2.83 | 29.23 |
| D402   | 80.71 | -2.84 | 29.65 |
| D403   | 80.46 | -2.76 | 29.83 |
| D801   | 81    | -2.8  | 29.73 |
| D802   | 81.06 | -2.8  | 29.44 |
| D803   | 81.64 | -2.94 | 29.69 |
| D1201  | 77.52 | -0.69 | 32.49 |
| D1202  | 77.85 | -0.86 | 32.2  |
| D1203  | 78.28 | -0.91 | 32.04 |
| ND40A1 | 41.66 | 2.08  | 17.94 |
| ND40A2 | 41.58 | 2.15  | 18.18 |
| ND40A3 | 41.42 | 2.15  | 17.9  |

|         |       |       |       |
|---------|-------|-------|-------|
| ND80A1  | 42.89 | 2.15  | 18.57 |
| ND80A2  | 43.08 | 2.27  | 18.88 |
| ND80A3  | 42.97 | 2.26  | 18.89 |
| ND120A1 | 42.61 | 2.8   | 17.51 |
| ND120A2 | 42.19 | 2.83  | 17.55 |
| ND120A3 | 42.16 | 2.85  | 17.49 |
| D40A1   | 41.97 | -0.47 | 15.32 |
| D40A2   | 41.72 | -0.43 | 15.3  |
| D40A3   | 41.83 | -0.45 | 15.27 |
| D80A1   | 43.44 | -0.35 | 14.81 |
| D80A2   | 43.31 | -0.35 | 15.14 |
| D80A3   | 43.57 | -0.33 | 14.97 |
| D120A1  | 43.67 | -0.52 | 15.12 |
| D120A2  | 43.02 | -0.52 | 15.15 |
| D120A3  | 43.47 | -0.51 | 15.42 |
| ND40S1  | 62.86 | 2.11  | 23.76 |
| ND40S2  | 62.71 | 2.12  | 23.8  |
| ND40S3  | 62.94 | 2.13  | 24.05 |
| ND80S1  | 65.97 | 1.71  | 22.28 |
| ND80S2  | 66.12 | 1.7   | 22.43 |
| ND80S3  | 66.16 | 1.72  | 22.46 |
| ND120S1 | 63.75 | -1.05 | 24.96 |
| ND120S2 | 63.81 | -1.05 | 24.97 |
| ND120S3 | 63.93 | -1.03 | 25.32 |
| D40S1   | 65.81 | 1.28  | 26.58 |
| D40S2   | 65.53 | 1.26  | 26.37 |
| D40S3   | 66.17 | 1.26  | 26.93 |
| D80S1   | 66.26 | 1.01  | 24.72 |
| D80S2   | 67.05 | 0.99  | 25.46 |
| D80S3   | 66.79 | 1.08  | 25.52 |
| D120S1  | 65.59 | -1.75 | 24.21 |

|        |      |       |       |
|--------|------|-------|-------|
| D120S2 | 65.5 | -1.67 | 24.3  |
| D120S3 | 65.6 | -1.72 | 24.51 |

Abbreviations: ND40, ND80, and ND120, non-dehulled meals treated at 40, 80, and 120 °C, respectively; D40, D80, and D120, dehulled meals treated at 40, 80, and 120 °C, respectively; ND40A, ND80A, ND120A, D40A, D80A, and D120A, protein isolates extracted from non-dehulled and dehulled meals via alkaline extraction; ND40S, ND80S, ND120S, D40S, D80S, and D120S, protein isolates extracted from non-dehulled and dehulled meals via salt extraction.

Table S4: Percentages of protein fractions in canola protein isolates

|         | Agg. And unfolded Cruciferins (%) | Cruciferin (%) | alpha chain (%) | beta chain (%) | napin (%) | napin long chain (%) | napin short chain (%) |
|---------|-----------------------------------|----------------|-----------------|----------------|-----------|----------------------|-----------------------|
| ND40A1  | 30.9472                           | 24.86541       | 6.16318         | 10.03284       | 21.03184  | 5.00975              | 1.11794               |
| ND40A2  | 31.5672                           | 25.48541       | 5.8885          | 10.17063       | 19.78574  | 5.19113              | 1.14682               |
| ND40A3  | 30.3272                           | 26.10541       | 6.4379          | 9.89505        | 22.27794  | 5.37251              | 1.1757                |
| ND80A1  | 30.31269                          | 25.90936       | 6.2068          | 10.09345       | 21.50167  | 4.56196              | 1.08906               |
| ND80A2  | 29.2717                           | 26.7553        | 5.9408          | 10.16816       | 20.88486  | 5.20988              | 1.16585               |
| ND80A3  | 31.3537                           | 25.0634        | 6.4728          | 10.01874       | 22.11848  | 4.88592              | 1.01227               |
| ND120A1 | 15.12703                          | 27.01478       | 7.958           | 11.66055       | 30.37054  | 6.25267              | 1.18383               |
| ND120A2 | 16.1501                           | 26.1601        | 8.3888          | 11.40139       | 29.93716  | 6.10201              | 1.15715               |
| ND120A3 | 14.104                            | 27.8695        | 8.8196          | 11.91971       | 30.80392  | 6.40333              | 1.21051               |
| D40A1   | 31.08469                          | 26.07676       | 6.34887         | 9.87647        | 20.13926  | 4.60086              | 0.95256               |
| D40A2   | 31.7914                           | 25.4146        | 6.0262          | 10.44994       | 21.05855  | 4.51629              | 0.9848                |
| D40A3   | 30.378                            | 26.7389        | 6.6715          | 9.303          | 21.97784  | 4.68543              | 0.92032               |
| D80A1   | 31.57124                          | 26.1362        | 6.36882         | 9.96252        | 20.95162  | 4.49125              | 0.90833               |
| D80A2   | 31.0565                           | 26.3555        | 6.8202          | 9.42565        | 20.56083  | 4.40268              | 0.85236               |
| D80A3   | 32.086                            | 24.3555        | 6.9175          | 10.49939       | 21.34241  | 4.57982              | 0.9643                |
| D120A1  | 25.98175                          | 26.72855       | 8.01222         | 11.30362       | 22.32985  | 4.81859              | 0.89262               |
| D120A2  | 26.6612                           | 25.9357        | 7.5473          | 11.97244       | 22.24234  | 4.7274               | 0.91568               |
| D120A3  | 25.3023                           | 27.5214        | 8.4771          | 10.6348        | 22.41736  | 4.63621              | 0.93874               |
| ND40S1  | 6.8585                            | 30.2058        | 7.92232         | 6.45944        | 39.41418  | 7.20311              | 1.5774                |
| ND40S2  | 7.0371                            | 29.5907        | 7.7341          | 6.63515        | 40.48503  | 7.045                | 1.55066               |
| ND40S3  | 7.2158                            | 30.8209        | 8.1105          | 6.81086        | 39.08503  | 7.36122              | 1.60414               |
| ND80S1  | 6.6816                            | 30.73967       | 7.99743         | 6.67196        | 38.84333  | 7.71684              | 1.80553               |

|         |         |          |         |         |          |         |         |
|---------|---------|----------|---------|---------|----------|---------|---------|
| ND80S2  | 6.485   | 31.5547  | 7.9181  | 6.29111 | 37.52597 | 7.43989 | 1.77396 |
| ND80S3  | 6.8782  | 29.9247  | 8.0768  | 7.05281 | 39.30441 | 7.99379 | 1.74239 |
| ND120S1 | 3.9716  | 28.4085  | 7.34419 | 6.49326 | 43.81744 | 8.09782 | 1.31843 |
| ND120S2 | 4.3087  | 29.0111  | 7.2798  | 6.63398 | 43.88264 | 7.1866  | 1.15779 |
| ND120S3 | 4.6459  | 29.6136  | 7.4086  | 6.7747  | 41.74784 | 9.00904 | 1.47907 |
| D40S1   | 6.67421 | 31.74363 | 7.091   | 6.38696 | 36.64961 | 8.78123 | 1.90159 |
| D40S2   | 6.5799  | 31.1787  | 7.2854  | 6.64332 | 37.22354 | 8.45027 | 1.86461 |
| D40S3   | 6.7685  | 32.3085  | 7.4798  | 6.1306  | 37.79747 | 9.11219 | 1.93857 |
| D80S1   | 6.358   | 32.7122  | 8.2185  | 7.02485 | 35.29868 | 9.15009 | 2.01768 |
| D80S2   | 7.0595  | 31.7188  | 7.7275  | 6.93886 | 34.72685 | 9.02067 | 1.96431 |
| D80S3   | 7.761   | 30.7254  | 7.2365  | 7.11084 | 35.87051 | 9.27951 | 2.07105 |
| D120S1  | 7.45271 | 32.34443 | 8.492   | 7.12112 | 34.21524 | 9.1977  | 1.85182 |
| D120S2  | 7.2765  | 32.2014  | 7.9102  | 7.25984 | 33.69769 | 8.84077 | 1.8226  |
| D120S3  | 7.6289  | 32.4874  | 8.2011  | 6.9824  | 34.73279 | 8.48384 | 1.79338 |

Abbreviations: ND40A, ND80A, ND120A, D40A, D80A, and D120A, protein isolates extracted from non-dehulled and dehulled meals via alkaline extraction; ND40S, ND80S, ND120S, D40S, D80S, and D120S, protein isolates extracted from non-dehulled and dehulled meals via salt extraction.

Table S5: Aqueous solubility of canola protein isolates

|         | Weight of the solubilized fraction after freeze drying (mg) | Protein content of the solubilized fraction (%) | Aqueous solubility (%) |
|---------|-------------------------------------------------------------|-------------------------------------------------|------------------------|
| ND40A1  | 70.21                                                       | 82.3                                            | 28.891415              |
| ND40A2  | 70.94                                                       | 81.4                                            | 28.87258               |
| ND40A3  | 70.52                                                       | 81.85                                           | 28.86031               |
| ND80A1  | 72.01                                                       | 83.31                                           | 29.9957655             |
| ND80A2  | 72.44                                                       | 83.74                                           | 30.330628              |
| ND80A3  | 72.25                                                       | 83.53                                           | 30.1752125             |
| ND120A1 | 94.12                                                       | 82.77                                           | 38.951562              |
| ND120A2 | 96.32                                                       | 83.13                                           | 40.035408              |
| ND120A3 | 95.26                                                       | 82.95                                           | 39.509085              |
| D40A1   | 70.9                                                        | 87.08                                           | 30.86986               |
| D40A2   | 70.01                                                       | 87.89                                           | 30.7658945             |
| D40A3   | 69.57                                                       | 87.49                                           | 30.4333965             |
| D80A1   | 72.12                                                       | 87.41                                           | 31.520046              |
| D80A2   | 72.56                                                       | 87.41                                           | 31.712348              |
| D80A3   | 72.25                                                       | 87.41                                           | 31.5768625             |
| D120A1  | 78.81                                                       | 88.39                                           | 34.8300795             |
| D120A2  | 75.52                                                       | 87.64                                           | 33.092864              |
| D120A3  | 76.75                                                       | 88.02                                           | 33.777675              |
| ND40S1  | 132.22                                                      | 89.49                                           | 59.161839              |
| ND40S2  | 132.04                                                      | 89.33                                           | 58.975666              |
| ND40S3  | 132.68                                                      | 89.41                                           | 59.314594              |
| ND80S1  | 119.23                                                      | 88.88                                           | 52.985812              |

|         |        |       |            |
|---------|--------|-------|------------|
| ND80S2  | 119.66 | 88.41 | 52.895703  |
| ND80S3  | 119.56 | 88.65 | 52.99497   |
| ND120S1 | 115.23 | 89.25 | 51.4213875 |
| ND120S2 | 120.51 | 88.84 | 53.530542  |
| ND120S3 | 117.44 | 89.05 | 52.29016   |
| D40S1   | 137.5  | 89.02 | 61.20125   |
| D40S2   | 131    | 90.45 | 59.24475   |
| D40S3   | 134.21 | 89.74 | 60.220027  |
| D80S1   | 131.87 | 89.88 | 59.262378  |
| D80S2   | 128.55 | 90.71 | 58.3038525 |
| D80S3   | 129.51 | 90.3  | 58.473765  |
| D120S1  | 115.33 | 88.53 | 51.0508245 |
| D120S2  | 120.12 | 89.29 | 53.627574  |
| D120S3  | 117.58 | 88.91 | 52.270189  |

Abbreviations: ND40A, ND80A, ND120A, D40A, D80A, and D120A, protein isolates extracted from non-dehulled and dehulled meals via alkaline extraction; ND40S, ND80S, ND120S, D40S, D80S, and D120S, protein isolates extracted from non-dehulled and dehulled meals via salt extraction.

Notes

Input Data

Descriptive Statistics

|        | N Analysis | N Missing | Mean     | Standard Deviation | SE of Mean |
|--------|------------|-----------|----------|--------------------|------------|
| ND40A  | 3          | 0         | 28.95542 | 0.41882            | 0.24181    |
| ND80A  | 3          | 0         | 30.16792 | 0.58509            | 0.3378     |
| ND120A | 3          | 0         | 39.49869 | 0.542              | 0.31292    |
| D40A   | 3          | 0         | 30.68903 | 0.65803            | 0.37991    |
| D80A   | 3          | 0         | 31.60309 | 0.47498            | 0.27423    |
| D120A  | 3          | 0         | 33.90021 | 0.87507            | 0.50522    |

ANOVA

Overall ANOVA

|       | DF | Sum of Squares | Mean Square | F Value   | Prob>F  |
|-------|----|----------------|-------------|-----------|---------|
| Model | 5  | 219.06943      | 43.81389    | 117.57611 | <0.0001 |
| Error | 12 | 4.47171        | 0.37264     |           |         |
| Total | 17 | 223.54114      |             |           |         |

Null Hypothesis: The means of all levels are equal.  
 Alternative Hypothesis: The means of one or more levels are different.  
**At the 0.05 level, the population means are significantly different.**

Fit Statistics

| R-Square | Coeff Var | Root MSE | Data Mean |
|----------|-----------|----------|-----------|
| 0.98     | 0.0188    | 0.61044  | 32.46906  |

Means Comparisons

Tukey Test

Grouping Letters Table

|        | Mean     | Groups |
|--------|----------|--------|
| ND120A | 39.49869 | A      |
| D120A  | 33.90021 | B      |
| D80A   | 31.60309 | C      |
| D40A   | 30.68903 | C      |
| ND80A  | 30.16792 | C D    |
| ND40A  | 28.95542 | D      |

Means that do not share a letter are significantly different.

Sig equals 1 indicates that the difference of the means is significant at the 0.05 level.  
 Sig equals 0 indicates that the difference of the means is not significant at the 0.05 level.

Notes

Input Data

Descriptive Statistics

|        | N Analysis | N Missing | Mean     | Standard Deviation | SE of Mean |
|--------|------------|-----------|----------|--------------------|------------|
| ND40S  | 3          | 0         | 59.1507  | 0.16974            | 0.098      |
| ND80S  | 3          | 0         | 52.95883 | 0.05486            | 0.03167    |
| ND120S | 3          | 0         | 52.41403 | 1.06002            | 0.612      |
| D40S   | 3          | 0         | 60.22201 | 0.97825            | 0.56479    |
| D80S   | 3          | 0         | 58.68    | 0.51146            | 0.29529    |
| D120S  | 3          | 0         | 52.3162  | 1.28899            | 0.7442     |

ANOVA

Overall ANOVA

|       | DF | Sum of Squares | Mean Square | F Value  | Prob>F  |
|-------|----|----------------|-------------|----------|---------|
| Model | 5  | 211.8056       | 42.36112    | 62.98229 | <0.0001 |
| Error | 12 | 8.07105        | 0.67259     |          |         |
| Total | 17 | 219.87665      |             |          |         |

Null Hypothesis: The means of all levels are equal.  
 Alternative Hypothesis: The means of one or more levels are different.  
**At the 0.05 level, the population means are significantly different.**

Fit Statistics

| R-Square | Coeff Var | Root MSE | Data Mean |
|----------|-----------|----------|-----------|
| 0.96329  | 0.01466   | 0.82011  | 55.95696  |

Means Comparisons

Tukey Test

Grouping Letters Table

|        | Mean     | Groups |
|--------|----------|--------|
| D40S   | 60.22201 | A      |
| ND40S  | 59.1507  | A      |
| D80S   | 58.68    | A      |
| ND80S  | 52.95883 | B      |
| ND120S | 52.41403 | B      |
| D120S  | 52.3162  | B      |

Means that do not share a letter are significantly different.

Sig equals 1 indicates that the difference of the means is significant at the 0.05 level.  
 Sig equals 0 indicates that the difference of the means is not significant at the 0.05 level.

Figure S4. ANOVA and Tukey's test results of the aqueous solubility of the isolates extracted from non-dehulled and dehulled meals through alkaline (ND40A, ND80A, ND120A, D40A, D80A and D120A) and salt (ND40S, ND80S, ND120S, D40S, D80S, D120S) extraction. Different letters (a-d) in the Tukey's test indicate significant differences ( $p < 0.05$ ) between the aqueous solubility of the isolates
